# Supplementary material for: Bubble buoyancy produces non-conserved energy multiplication experiments
Source: Research Square preprint supplement (doi:10.21203/rs.3.rs-4997041/v1), 2024-09-27
Supplement: Supplementary file 1 [file dd1dc9bf56a3b08e2c9e60bd.docx]

**Experimental data**

**1.Fish tank test**

Pump A , model: 370, the fish tank is made of PVC transparent body, diameter 200mm, the water surface height in the fish tank: 0.7m, the energizing voltage: 4.5V, the working current is 0.09A, the power consumption: 0.4W, it takes a few seconds to get bubbles from the power on to the underwater air outlet, 1s enters the bubbles in the water, and it takes about 2s to 0.7m high water surface, at any time, the amount of bubbles floating in the water is 2 times the amount of air pump.

**Tab.1 Experimental data of pump A**

| **Timing** | **water level** | **Air pump model** | **voltage** | **current** | **power** | **Bubble position** | **Bubble power** |
| --- | --- | --- | --- | --- | --- | --- | --- |
| 0 | 0.7m | 370 | 0 | 0 | 0 | 0 | 0 |
| 1s | 0.7m | 370 | 4.5V | 0.11A | 0.49W | In the middle of the water | Equal to the input |
| After 2s | 0.7m | 370 | 4.5V | 0.09A | 0.4W | Out of the water | 2 times the input power |
| persistent | 0.7m | 370 | 4.5V | 0.09A | 0.4W | Out of the water | 2 times the input power |

Pump B, model: 370, fish tank water surface height: 0.7m, energizing voltage: 4.5V, working current 0.033A, power consumption: 0.15W, energized to the connecting pipe water is ejected until the water comes out of the air pump mouth, a few seconds longer than A air pump, 1s input water bubbles float 0.7m high water surface time 2s. The total amount of air bubbles in the water is always twice the amount of air pump. However, the amount of air delivered by pump A and the amount of air bubbles in the water are slightly less.

**Tab.2 Experimental data of pump B**

| **Timing** | **water level** | **Air pump model** | **voltage** | **current** | **power** | **Bubble position** | **Bubble power** |
| --- | --- | --- | --- | --- | --- | --- | --- |
| 0 | 0.7m | 370 | 0 | 0 | 0 | 0 | 0 |
| 1s | 0.7m+ | 370 | 4.5V | 0.04A | 0.18W | In the middle of the water | Equal to the input |
| After 2s | 0.7m+ | 370 | 4.5V | 0.033A | 0.15W | Out of the water | 2 times the input power |
| persistent | 0.7m+ | 370 | 4.5V | 0.033A | 0.15W | Out of the water | 2 times the input power |

The two experiments show that the amount of retained bubbles in the water is twice that of the pump, and the total amount of bubbles in the water depends on the height of the water level in the fish tank.

**2. 1 .8m high water level vertical 4m pipeline inflation test**

In this experiment, PU transparent pipe, outer diameter 14mm, inner diameter 10mm, vertical pipe height 4m fixed on the shelf, the upper nozzle is connected to the diameter of 75mm open box, the lower end of the nozzle is connected to the tee through the inner diameter of 7.5mm and the length of 0.5m UV transparent pipe, one end of the tee is connected to the pressure gauge, and the other end is connected to the 370 air pump through the 8cm UV transparent pipe with an inner diameter of 2mm, and water is added to the water pipe by the open box, so that the water level height: 1.8m, bubble capacity: (0.1/2)2×3.14×22=0.1727L, with A, B, C, D four kinds of air pumps, three voltage tests are as follows:

Air pump A, voltage: 4.5V, starting current: 0.12A, operating current: 0.09A, power: 0.4W, energized for 15s, bubbles reach the bottom of the high-level water tank. 1s input bubble volume: 0.1727L/15s≈0.0115L, 1s input bubble power: 0.0115L×9.8×0.28m/s≈0.032J/s≈0.032W, total buoyancy power of pipeline bubbles: 0.1727L×9.8×0.28m/s≈0.47J/s≈0.47W. It is about 15 times the input bubble power in 1s and about 1.2 times the input electrical power of 0.4W.

**Tab.3 Experimental data of pump A**

| **Timing** | **water level** | **Air pump model** | **voltage** | **current** | **power** | **Bubble position** | **Bubble power** |
| --- | --- | --- | --- | --- | --- | --- | --- |
| 0 | 1.8m | 370 | 0 | 0 | 0 | 0 | 0 |
| 1s | 1.9m | 370 | 4.5V | 0.11A | 0.49W | 0.28m | equal to the input |
| 15s | 4m | 370 | 4.5V | 0.09A | 0.4W | Full tube | 15 times the input power |
| persistent | 4m | 370 | 4.5V | 0.09A | 0.4W | Full tube | 15 times the input power |

Air pump B, voltage, 6V, starting current: 0.12A, running current: 0.09A, power: 0.54W. From start to the bottom of the water tank, it takes 11 seconds for the bubbles to reach the bottom. The input bubble volume per second is 0.1727L/11s=0.0157L, and the input bubble power per second is 0.0157L×9.8×0.4m/s≈0.06J/s≈0.06W. The buoyancy power of the total bubble volume in the pipeline is 0.1727L×9.8×0.4m/s≈0.68J/s≈0.68W, which is about 11 times the input bubble power per second and about 1.26 times the input electrical power of 0.54W.

**Tab.4 Experimental data of pump B**

| **Timing** | **water level** | **Air pump model** | **voltage** | **current** | **power** | **Bubble position** | **Bubble power** |
| --- | --- | --- | --- | --- | --- | --- | --- |
| 0 | 1.8m | 370 | 0 | 0 | 0 | 0 | 0 |
| 1s | 1.9m | 370 | 6V | 0.11A | 0.66W | 0.4m | equal to the input |
| 11s | 4m | 370 | 6V | 0.09A | 0.54W | Full tube | 11 times the input power |
| persistent | 4m | 370 | 6V | 0.09A | 0.54W | Full tube | 11 times the input power |

Air pump C, voltage: 6V, starting current: 0.05A, working current: 0.04A, power: 0.24W, air pump working for about 20s, still not reaching the bottom of the 4m water box, bubbles are divided through the water column and overflow at a height of 3.5m. Obviously, the air pump outputs a small amount of bubbles and has a low floating speed. In this state, it is impossible to accurately calculate the bubble floating speed and measure the amount of bubbles doing work.

**Tab.5 Experimental data of pump C**

| **Timing** | **water level** | **Air pump model** | **voltage** | **current** | **power** | **Bubble position** | **Bubble power** |
| --- | --- | --- | --- | --- | --- | --- | --- |
| 0 | 1.8m | 370 | 0 | 0 | 0 | 0 | 0 |
| 1s | 1.9m | 370 | 6V | 0.05A | 0.03W | 0.21m | equal to the input |
| 20s | 4m | 370 | 6V | 0.04A | 0.24W | Full tube |  |
| persistent | 4m | 370 | 6V | 0.04A | 0.24W | Full tube |  |

Air pump D, voltage: 3V, starting current: 0.26A, working current: 0.19A, power: 0.54W, air pump working for 9s, bubbles reaching the bottom of the water tank, compared to air pumps A, B, and C, the bubbles have the fastest floating speed and the highest efficiency, 1s input bubble volume: 0.1727L/8s≈0.0221L, 1s input bubble power: 0.022L×9.8×0.5m/s≈0.1J/s≈0.1W, total buoyant work of the pipeline: 0.1727L×9.8×0.5m/s≈0.85J/s≈0.85W. It is about 8 times the power of 1s input bubbles and about 1.57 times the input power of 0.54W.

Therefore, the working parameters of the D air pump are included in the paper as a typical analysis.

**Tab.6 Experimental data of pump D**

| **Timing** | **water level** | **Air pump model** | **voltage** | **current** | **power** | **Bubble position** | **Bubble power** |
| --- | --- | --- | --- | --- | --- | --- | --- |
| 0 | 1.8m | 370 | 0 | 0 | 0 | 0 | 0 |
| 1s | 1.9m | 370 | 3V | 0.25A | 0.75W | 0.5m | equal to the input |
| 9s | 4m | 370 | 3V | 0.19A | 0.57W | Full tube | 8 times the input power |
| persistent | 4m | 370 | 3V | 0.09A | 0.57W | Full tube | 8 times the input power |

Several sets of experiments have shown that the quality and efficiency of air pumps vary greatly. Regardless of which air pump is used, the bubble time of the input pipeline is less than the bubble floating time in the pipeline. The former has a long bubble retention time, but a slow floating speed, and the bubble work amount is small, while the latter has a short bubble retention time, but a fast floating speed, and the bubble work amount is large. Therefore, there should be a peak efficiency in the system's bubble-to-input power ratio. If the water level is increased, will the bubble work amount increase?

**3. Inflation test of 2.2m high water level vertical pipeline**

The static water level increased to 2.2m, and when the air pumps A, B, C, and D were connected and started, a large amount of water was pushed into the water tank after the bubbles reached the bottom of the tank, as shown in Fig.1 below. Therefore, it is impossible to determine the actual amount of water in the pipeline and the actual amount of bubbles in the pipeline. It is impossible to accurately calculate the buoyancy work.

**
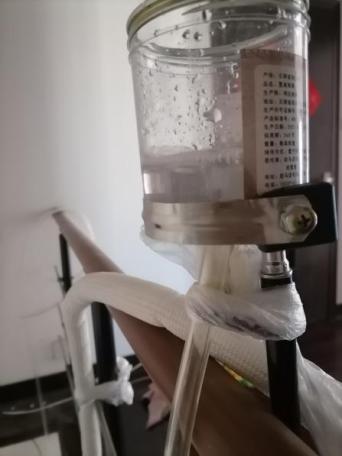
**

**Fig.1 Water flew into the water tank**

**4. Inflation test of 2.2m high water level vertical pipeline**

Air pump D, voltage: 3V, starting current: 0.26A, working current: 0.19A, power: 0.54W, after the air pump works, the air bubble is up to 3.5m, and it can't reach the bottom of the 4m water tank.

Using air pumps A, B, and C, the water level did not rise to 4 meters, but already overflowed, with a distance of 0.4-0.7 meters from the bottom of the water tank, as shown in Fig.2 below. It is impossible to accurately measure the volume of bubbles and calculate the power of work.

**
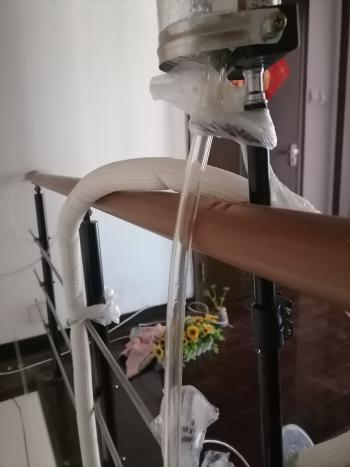
**

**Fig.2 Water did not flow into the water tank**

Therefore, the operating parameters of each air pump correspond to the water level height for maximum efficiency. In fact, when the D pump is working at 1.3 meters, by slowly adding water from the upper water tank, the water level eventually reaches the bottom of the 4-meter-high water tank, thus determining the amount of water used. Five minutes after stopping the pump, the water level is measured to be 1.8 meters, which serves as an example for analysis in this paper.

**5. Latest progress**

After completing the paper, a batch of 370 air pumps E were purchased. With a water level of 1.3m, the air pump started 9s after the air bubbles reached the bottom of the water tank. The working voltage was 5V, the working current was 0.085A, and the power was 0.42W, which was less than the value of 0.6W in the paper. The total height of the working bubbles in the pipeline was 4-1.3m=2.7m, and the volume of the working bubbles was (0.1/2)2×3.1416×27≈0.21L. The power of the work was W=0.21×9.8×0.5m/s≈1.03j/s≈1.03W, which was higher than the case in the paper of 0.8W. Under this condition, the buoyancy power of the bubbles was 2.4 times the power consumption of the air pump. This proves once again that the experimental data in the paper are not the highest efficiency, and interested scientists can easily achieve and replicate them.

**Tab.7 Experimental data of pump E**

| **Timing** | **water level** | **Air pump model** | **voltage** | **current** | **power** | **Bubble position** | **Bubble power** |
| --- | --- | --- | --- | --- | --- | --- | --- |
| 0 | 1.3m | 370 | 0 | 0 | 0 | 0 | 0 |
| 1s | 1.8m | 370 | 5V | 0.12A | 0.6W | 0.5m | equal to the input |
| 9s | 4m | 370 | 5V | 0.085A | 0.42W | Full tube | 10 times the input power |
| persistent | 4m | 370 | 5V | 0.085A | 0.42W | Full tube | 10 times the input power |

In our experiments, we usually control the water level at 1.3m. After the air pump is working, the gas divides and passes through the water column. If it cannot reach the bottom of the water tank, we can slowly add water to the top water tank until the highest water level reaches the bottom of the water tank. When the work stops for about 5 minutes, observe that there are no bubbles in the pipeline. At this time, the water level and the pressure gauge correspond to the experimental and calculated values. However, the higher the water level, the greater the work done.

**6. Experimental situation of pipeline heightening to 5.4m**

Next case: Still using a 14mm outer diameter, 10mm inner diameter pipe, a height of 5.4m, using E air pumps, a water level height of 2.2m, a total bubble volume height of 3.2m, a total volume of 0.25L, a working voltage of 5V, a current of 0.11A, and a power of 0.55W. However, after stopping the air pump for 5 minutes, it takes 18s for the water level to reach the bottom of the water tank after restarting. Apparently, the bubble floating speed is slow, only 0.3m/s, and the bubble work amount is 0.25L×9.8×0.3m/s=0.735w, which is lower than the work amount of 1.3m water level in a 4m high pipeline. Therefore, when the air pump air output, pipe diameter, total pipe height, and water level height reach the optimal ratio, the highest efficiency is produced.

Model 370 air pump, with various voltage specifications: 3V, 4.5V, 5V, 6V, 12V, etc. If you are unsure whether the voltage specifications of the model you purchased meet the requirements, we recommend contacting us to purchase our finished products, including air pump, pressure gauge, tubing, open box, and connected pipe fittings.
